# Supplementary material for: Evolution of submarine canyons and hanging-wall fans: insights from geomorphic experiments and morphodynamic models
Source: Copernicus journal article supplement (doi:10.5194/esurf-12-621-2024), 2024-04-29
Supplement: Supplementary file 1 [file esurf-12-621-2024-supplement.pdf]

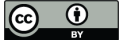

*Supplement of*

## **Evolution of submarine canyons and hanging-wall fans: insights from geomorphic experiments and morphodynamic models**

**Steven Y. J. Lai et al.**

*Correspondence to:* Steven Y. J. Lai ([stevenyjlai@mail.ncku.edu.tw](mailto:stevenyjlai@mail.ncku.edu.tw))

The copyright of individual parts of the supplement might differ from the article licence.

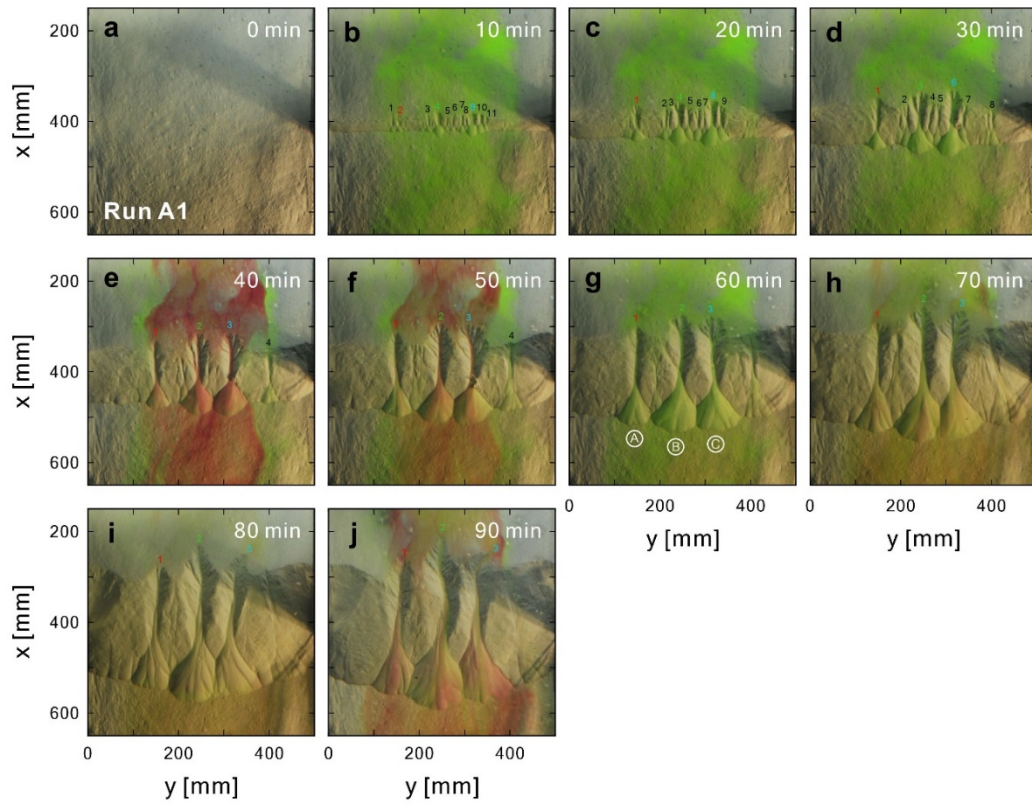

**Figure S1. Orthophotos of Run A1 from  $t = 0$  to 90 min. Stage interval is 10 min. Numbers at each canyon head represent each traced canyon-fan system.**

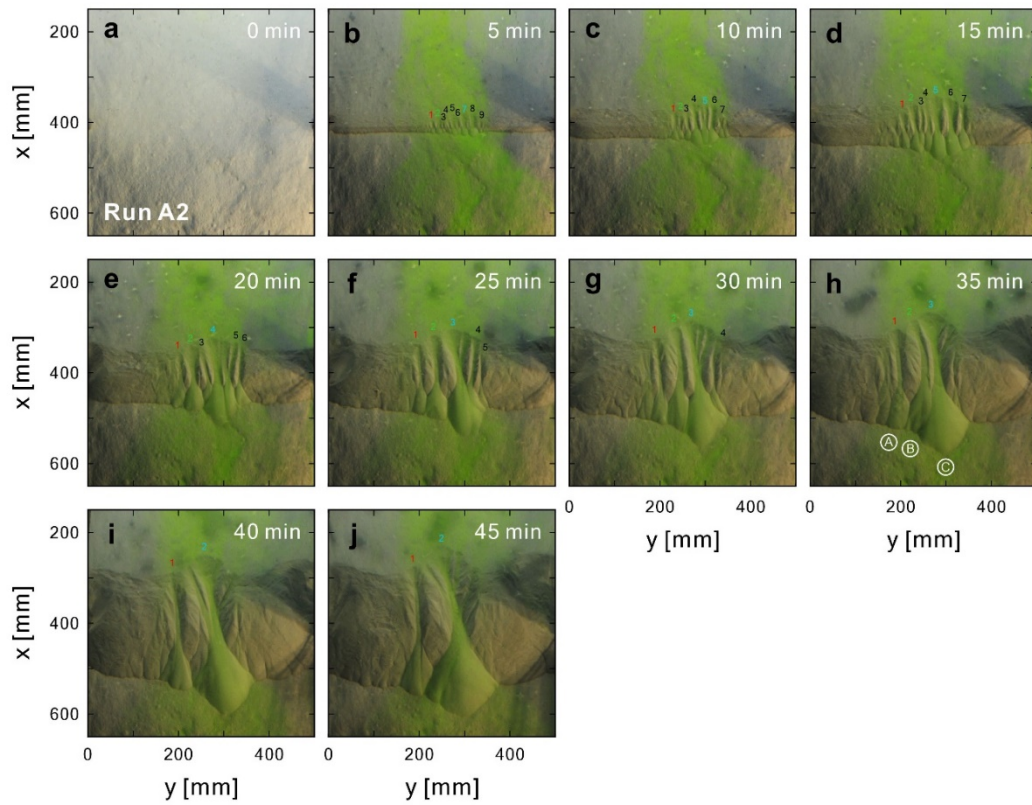

**Figure S2. Orthophotos of Run A2 from  $t = 0$  to 45 min. Stage interval is 5 min.**

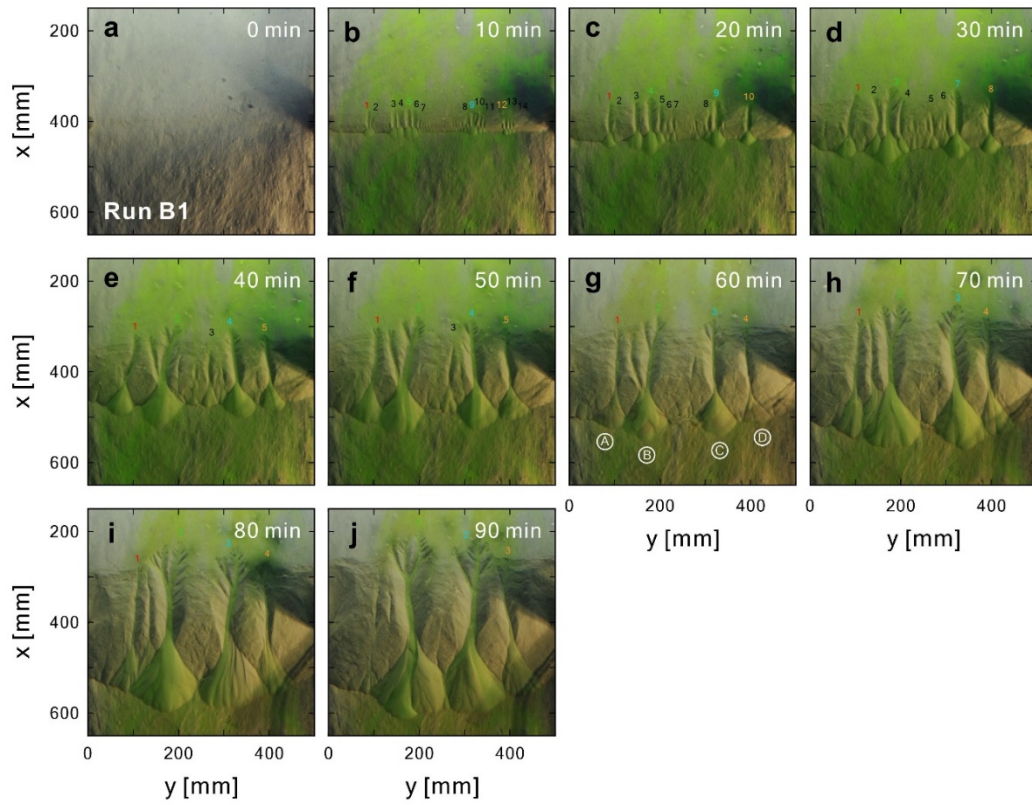

Figure S3. Orthophotos of Run B1 from  $t = 0$  to 90 min. Stage interval is 10 min.

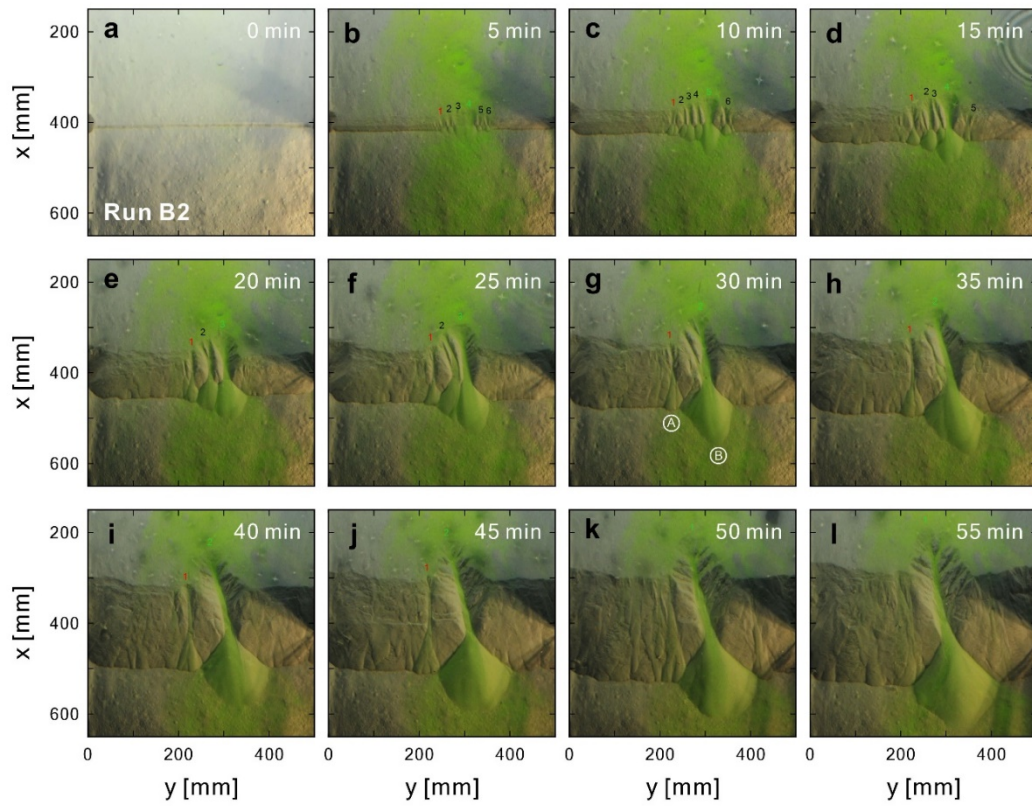

Figure S4. Orthophotos of Run B2 from  $t = 0$  to 55 min. Stage interval is 5 min.



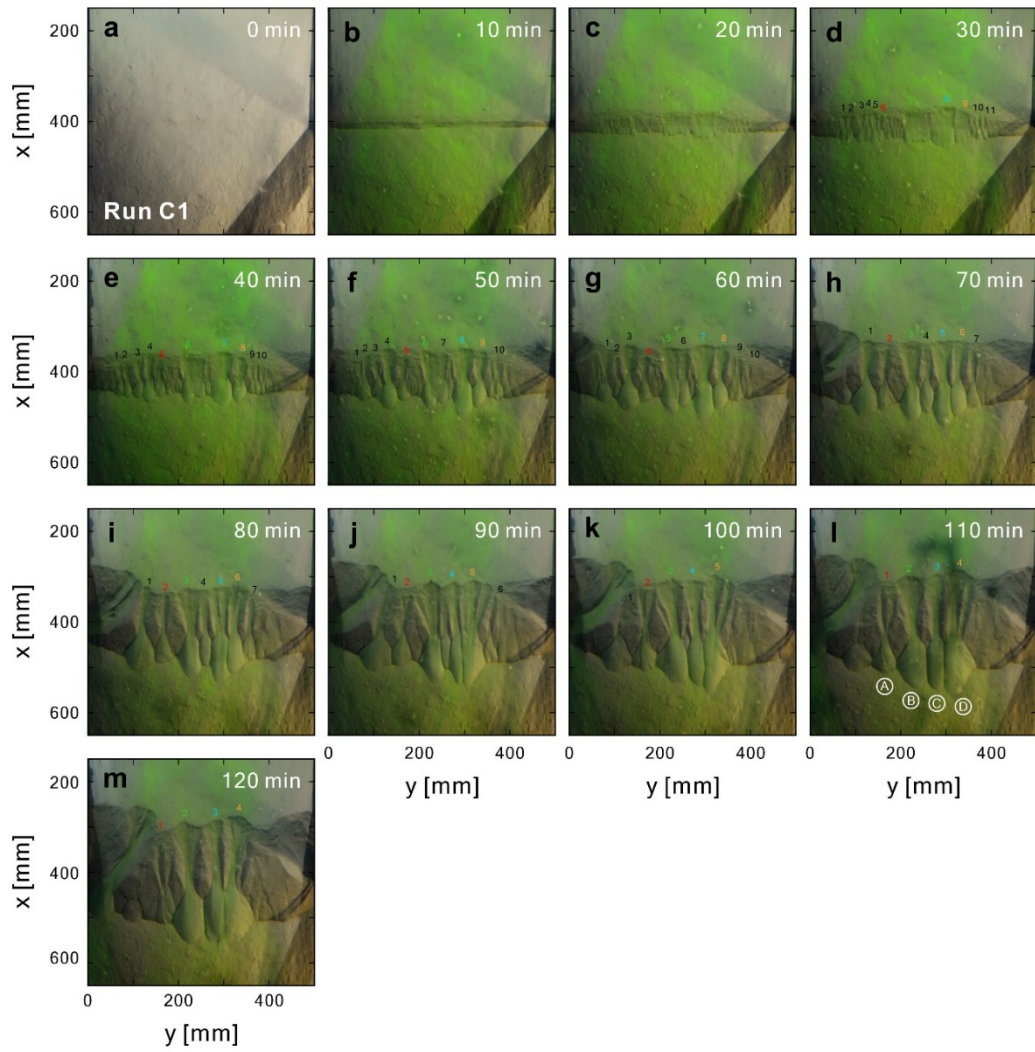

Figure S5. Orthophotos of Run C1 from  $t = 0$  to 120 min. Stage interval is 10 min.

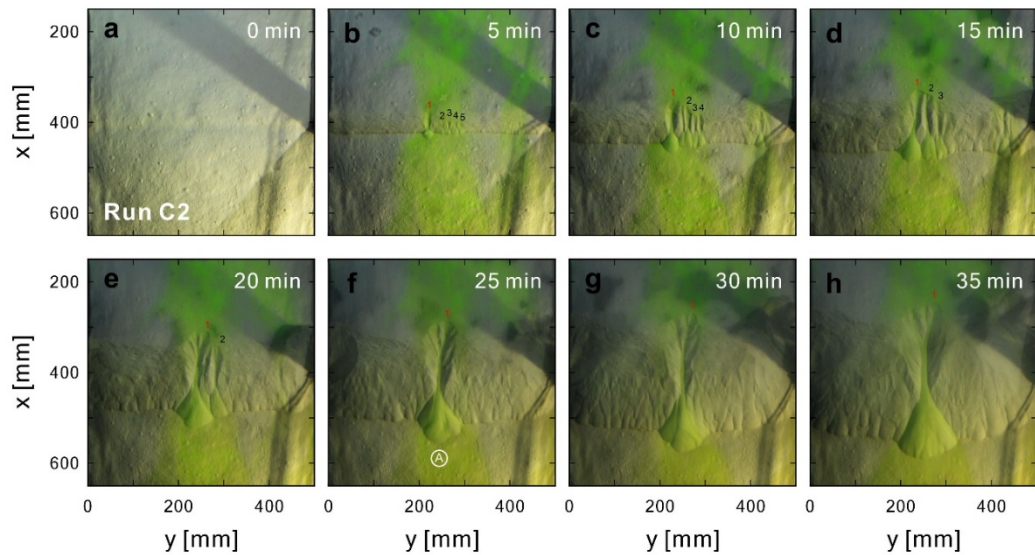

Figure S6. Orthophotos of Run C2 from  $t = 0$  to 35 min. Stage interval is 5 min.

**Table S1. Evolution history of identified and traced submarine canyon-fan systems of Run A1.**

|               | System                                    | System A                                 |   |   | System B                              |   |   |   | System C                              |   |    |    |
|---------------|-------------------------------------------|------------------------------------------|---|---|---------------------------------------|---|---|---|---------------------------------------|---|----|----|
|               | Type                                      | Shallow shelf-incising canyon-fan system |   |   | Deep shelf-incising canyon-fan system |   |   |   | Deep shelf-incising canyon-fan system |   |    |    |
| <b>Run A1</b> | <b>Stage</b>                              | <b>System number identified</b>          |   |   |                                       |   |   |   |                                       |   |    |    |
|               | Stage01                                   | 1                                        | 2 | 3 | 4                                     | 5 | 6 | 7 | 8                                     | 9 | 10 | 11 |
|               | Stage02                                   |                                          | 1 | 2 | 3                                     | 4 | 5 | 6 | 7                                     | 8 | 9  |    |
|               | Stage03                                   |                                          | 1 |   | 2                                     | 3 | 4 | 5 |                                       | 6 | 7  | 8  |
|               | Stage04                                   |                                          | 1 |   |                                       | 2 |   |   |                                       | 3 |    | 4  |
|               | Stage05                                   |                                          | 1 |   |                                       | 2 |   |   |                                       | 3 |    | 4  |
|               | Stage06                                   |                                          | 1 |   |                                       | 2 |   |   |                                       | 3 |    |    |
|               | Stage07                                   |                                          | 1 |   |                                       | 2 |   |   |                                       | 3 |    |    |
|               | Stage08                                   |                                          | 1 |   |                                       | 2 |   |   |                                       | 3 |    |    |
|               | Stage09                                   |                                          | 1 |   |                                       | 2 |   |   |                                       | 3 |    |    |
|               | <b>Total number of identified systems</b> |                                          |   |   |                                       |   |   |   |                                       |   |    | 42 |
|               | <b>Numbers of traced system</b>           |                                          |   |   |                                       |   |   |   |                                       |   |    | 27 |

**Table S2. Evolution history of identified and traced submarine canyon-fan systems of Run A2.**

|               | System                                    | System A                                 | System B                                 |   |   |   |   | System C                              |   |    |
|---------------|-------------------------------------------|------------------------------------------|------------------------------------------|---|---|---|---|---------------------------------------|---|----|
|               | Type                                      | Shallow shelf-incising canyon-fan system | Shallow shelf-incising canyon-fan system |   |   |   |   | Deep shelf-incising canyon-fan system |   |    |
| <b>Run A2</b> | <b>Stage</b>                              | <b>System number identified</b>          |                                          |   |   |   |   |                                       |   |    |
|               | Stage01                                   | 1                                        | 2                                        | 3 | 4 | 5 | 6 | 7                                     | 8 | 9  |
|               | Stage02                                   | 1                                        | 2                                        | 3 | 4 |   |   | 5                                     | 6 | 7  |
|               | Stage03                                   | 1                                        | 2                                        | 3 | 4 |   |   | 5                                     | 6 | 7  |
|               | Stage04                                   | 1                                        | 2                                        | 3 |   |   |   | 4                                     | 5 | 6  |
|               | Stage05                                   | 1                                        | 2                                        |   |   |   |   | 3                                     | 4 | 5  |
|               | Stage06                                   | 1                                        | 2                                        |   |   |   |   | 3                                     | 4 |    |
|               | Stage07                                   | 1                                        | 2                                        |   |   |   |   | 3                                     |   |    |
|               | Stage08                                   | 1                                        |                                          |   |   |   |   | 2                                     |   |    |
|               | Stage09                                   | 1                                        |                                          |   |   |   |   | 2                                     |   |    |
|               | <b>Total number of identified systems</b> |                                          |                                          |   |   |   |   |                                       |   | 45 |
|               | <b>Numbers of traced system</b>           |                                          |                                          |   |   |   |   |                                       |   | 25 |

**Table S3. Evolution history of identified and traced submarine canyon-fan systems of Run B1.**

|                                 | System                                    | System A                      |   |   |   | System B                   |   |   |   | System C                   |   |    |    | System D                      |    |    |    |
|---------------------------------|-------------------------------------------|-------------------------------|---|---|---|----------------------------|---|---|---|----------------------------|---|----|----|-------------------------------|----|----|----|
|                                 | Type                                      | Shallow shelf-incising canyon |   |   |   | Deep shelf-incising canyon |   |   |   | Deep shelf-incising canyon |   |    |    | Shallow shelf-incising canyon |    |    |    |
|                                 | Stage                                     | System number identified      |   |   |   |                            |   |   |   |                            |   |    |    |                               |    |    |    |
| <b>Run B1</b>                   | Stage01                                   | 1                             | 2 | 3 | 4 | 5                          | 6 | 7 |   | 8                          | 9 | 10 | 11 | 12                            | 13 | 14 |    |
|                                 | Stage02                                   | 1                             | 2 | 3 |   | 4                          | 5 | 6 | 7 |                            | 8 | 9  |    | 10                            |    |    |    |
|                                 | Stage03                                   | 1                             |   | 2 |   | 3                          | 4 |   |   | 5                          | 6 | 7  |    | 8                             |    |    |    |
|                                 | Stage04                                   | 1                             |   |   |   | 2                          |   |   |   | 3                          |   | 4  |    | 5                             |    |    |    |
|                                 | Stage05                                   | 1                             |   |   |   | 2                          |   |   |   | 3                          |   | 4  |    | 5                             |    |    |    |
|                                 | Stage06                                   | 1                             |   |   |   | 2                          |   |   |   |                            | 3 |    |    | 4                             |    |    |    |
|                                 | Stage07                                   | 1                             |   |   |   | 2                          |   |   |   |                            | 3 |    |    | 4                             |    |    |    |
|                                 | Stage08                                   | 1                             |   |   |   | 2                          |   |   |   |                            | 3 |    |    | 4                             |    |    |    |
|                                 | Stage09                                   |                               |   |   |   | 1                          |   |   |   |                            | 2 |    |    | 3                             |    |    |    |
|                                 | <b>Total number of identified systems</b> |                               |   |   |   |                            |   |   |   |                            |   |    |    |                               |    |    | 57 |
| <b>Numbers of traced system</b> |                                           |                               |   |   |   |                            |   |   |   |                            |   |    |    |                               |    | 35 |    |

**Table S4. Evolution history of identified and traced submarine canyon-fan systems of Run B2.**

|                                 | System                                    | System A                                 |   |  |  | System B                              |   |   |   |    |
|---------------------------------|-------------------------------------------|------------------------------------------|---|--|--|---------------------------------------|---|---|---|----|
|                                 | Type                                      | Shallow shelf-incising canyon-fan system |   |  |  | Deep shelf-incising canyon-fan system |   |   |   |    |
|                                 | Stage                                     | System number identified                 |   |  |  |                                       |   |   |   |    |
| <b>Run B2</b>                   | Stage01                                   | 1                                        |   |  |  | 2                                     | 3 | 4 | 6 |    |
|                                 | Stage02                                   | 1                                        | 2 |  |  | 3                                     | 4 | 5 | 6 |    |
|                                 | Stage03                                   | 1                                        |   |  |  | 2                                     | 3 | 4 | 5 |    |
|                                 | Stage04                                   | 1                                        |   |  |  | 2                                     |   | 3 |   |    |
|                                 | Stage05                                   | 1                                        |   |  |  | 2                                     |   | 3 |   |    |
|                                 | Stage06                                   | 1                                        |   |  |  |                                       |   | 2 |   |    |
|                                 | Stage07                                   | 1                                        |   |  |  |                                       |   | 2 |   |    |
|                                 | Stage08                                   | 1                                        |   |  |  |                                       |   | 2 |   |    |
|                                 | Stage09                                   | 1                                        |   |  |  |                                       |   | 2 |   |    |
|                                 | Stage10                                   |                                          |   |  |  |                                       |   | 1 |   |    |
|                                 | Stage11                                   |                                          |   |  |  |                                       |   | 1 |   |    |
|                                 | <b>Total number of identified systems</b> |                                          |   |  |  |                                       |   |   |   |    |
| <b>Numbers of traced system</b> |                                           |                                          |   |  |  |                                       |   |   |   | 20 |

**Table S5. Evolution history of identified and traced submarine canyon-fan systems of Run C1.**

|                                           |               |                                 |   |   |   |   |                                         |                                                 |   |                                                 |                                                 |    |    |
|-------------------------------------------|---------------|---------------------------------|---|---|---|---|-----------------------------------------|-------------------------------------------------|---|-------------------------------------------------|-------------------------------------------------|----|----|
| <b>Run C1</b>                             | <b>System</b> |                                 |   |   |   |   | <b>System A</b>                         | <b>System B</b>                                 |   | <b>System C</b>                                 | <b>System D</b>                                 |    |    |
|                                           | <b>Type</b>   |                                 |   |   |   |   | <b>Slope-confined canyon-fan system</b> | <b>Shallow shelf-incising canyon-fan system</b> |   | <b>Shallow shelf-incising canyon-fan system</b> | <b>Shallow shelf-incising canyon-fan system</b> |    |    |
|                                           | <b>Stage</b>  | <b>System number identified</b> |   |   |   |   |                                         |                                                 |   |                                                 |                                                 |    |    |
|                                           | Stage01       | No canyon-fan systems           |   |   |   |   |                                         |                                                 |   |                                                 |                                                 |    |    |
|                                           | Stage02       | No canyon-fan systems           |   |   |   |   |                                         |                                                 |   |                                                 |                                                 |    |    |
|                                           | Stage03       | 1                               | 2 | 3 | 4 | 5 | 6                                       | 7                                               |   | 8                                               | 9                                               | 10 | 11 |
|                                           | Stage04       | 1                               | 2 |   | 3 | 4 | 5                                       | 6                                               |   | 7                                               | 8                                               | 9  | 10 |
|                                           | Stage05       | 1                               | 2 |   | 3 | 4 | 5                                       | 6                                               | 7 | 8                                               | 9                                               | 10 |    |
|                                           | Stage06       |                                 | 1 |   | 2 | 3 | 4                                       | 5                                               | 6 | 7                                               | 8                                               | 9  | 10 |
|                                           | Stage07       |                                 |   |   |   | 1 | 2                                       | 3                                               | 4 | 5                                               | 6                                               | 7  |    |
|                                           | Stage08       |                                 |   |   |   | 1 | 2                                       | 3                                               | 4 | 5                                               | 6                                               | 7  |    |
|                                           | Stage09       |                                 |   |   |   | 1 | 2                                       | 3                                               |   | 4                                               | 5                                               | 6  |    |
|                                           | Stage10       |                                 |   |   |   | 1 | 2                                       | 3                                               |   | 4                                               | 5                                               |    |    |
|                                           | Stage11       |                                 |   |   |   |   | 1                                       | 2                                               |   | 3                                               | 4                                               |    |    |
|                                           | Stage12       |                                 |   |   |   |   | 1                                       | 2                                               |   | 3                                               | 4                                               |    |    |
| <b>Total number of identified systems</b> |               |                                 |   |   |   |   |                                         |                                                 |   |                                                 |                                                 | 74 |    |
| <b>Numbers of traced system</b>           |               |                                 |   |   |   |   |                                         |                                                 |   |                                                 |                                                 | 40 |    |

**Table S6. Evolution history of identified and traced submarine canyon-fan systems of Run C2.**

|               |                                           |                                              |   |   |   |    |
|---------------|-------------------------------------------|----------------------------------------------|---|---|---|----|
| <b>Run C2</b> | <b>System</b>                             | <b>System A</b>                              |   |   |   |    |
|               | <b>Type</b>                               | <b>Deep shelf-incising canyon-fan system</b> |   |   |   |    |
|               | <b>Stage</b>                              | <b>System number identified</b>              |   |   |   |    |
|               | Stage01                                   | 1                                            | 2 | 3 | 4 | 5  |
|               | Stage02                                   | 1                                            | 2 | 3 | 4 |    |
|               | Stage03                                   | 1                                            | 2 |   | 3 |    |
|               | Stage04                                   | 1                                            |   |   | 2 |    |
|               | Stage05                                   | 1                                            |   |   |   |    |
|               | Stage06                                   | 1                                            |   |   |   |    |
|               | Stage07                                   | 1                                            |   |   |   |    |
|               | <b>Total number of identified systems</b> |                                              |   |   |   | 17 |
|               | <b>Numbers of traced system</b>           |                                              |   |   |   | 7  |

Captions for Video S1 to S6 (Files uploaded separately at: <http://doi.org/10.5281/zenodo.7271139>)

**Video S1.** This film shows the evolution of submarine canyon-fan systems of Run A1 from  $t = 0$  to 90 min.

**Video S2.** This film shows the evolution of submarine canyon-fan systems of Run A2 from  $t = 0$  to 45 min.

**Video S3.** This film shows the evolution of submarine canyon-fan systems of Run B1 from  $t = 0$  to 90 min.

**Video S4.** This film shows the evolution of submarine canyon-fan systems of Run B2 from  $t = 0$  to 55 min.

**Video S5.** This film shows the evolution of submarine canyon-fan systems of Run C1 from  $t = 0$  to 120 min.

**Video S6.** This film shows the evolution of submarine canyon-fan systems of Run C2 from  $t = 0$  to 35 min.

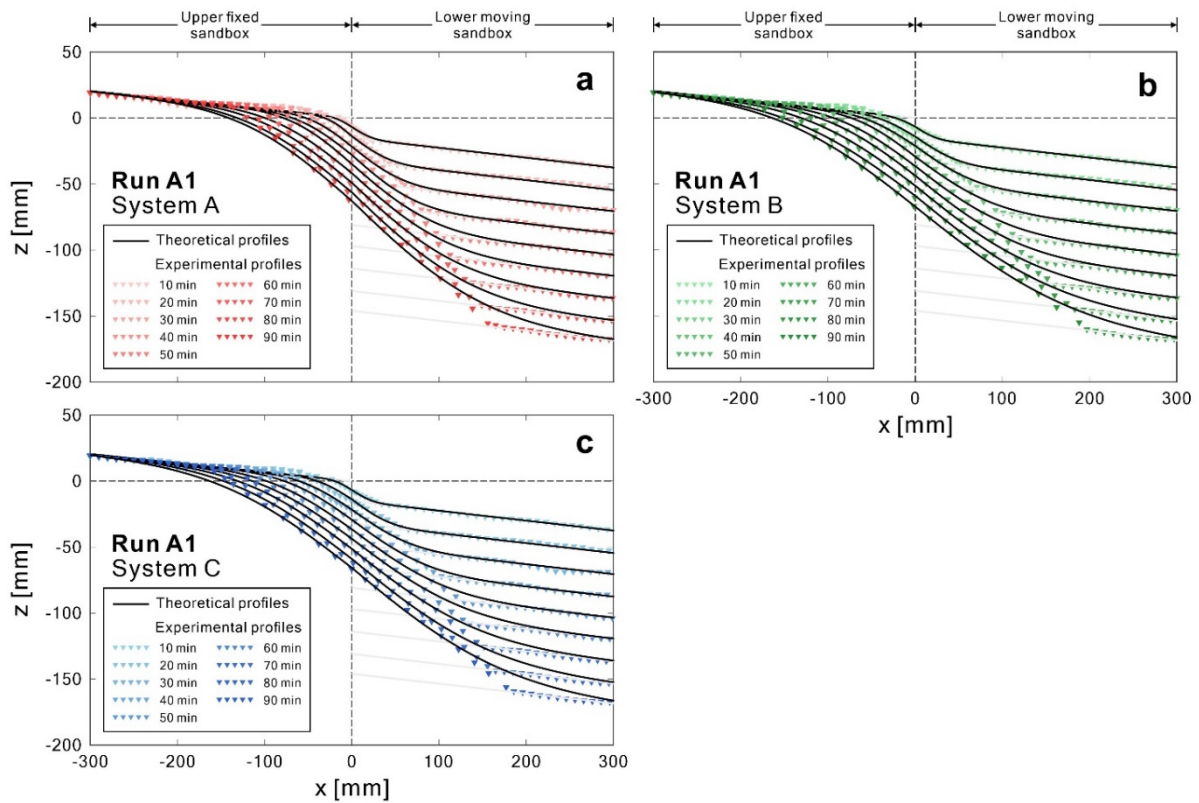

**Figure S7.** Comparisons between experimental and modeled submarine canyon-fan long profiles of each system at different stages for Run A1.



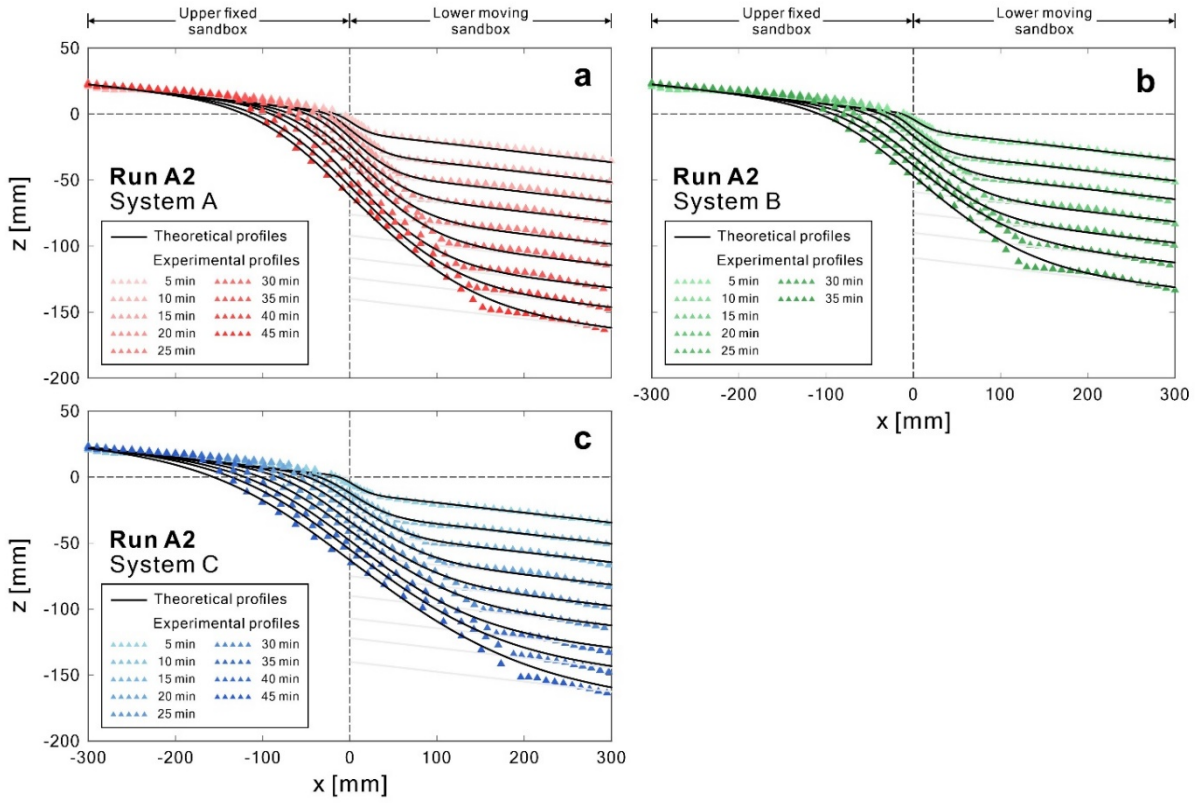

Figure S8. Comparisons between experimental and modeled submarine canyon-fan long profiles of each system at different stages for Run A2.

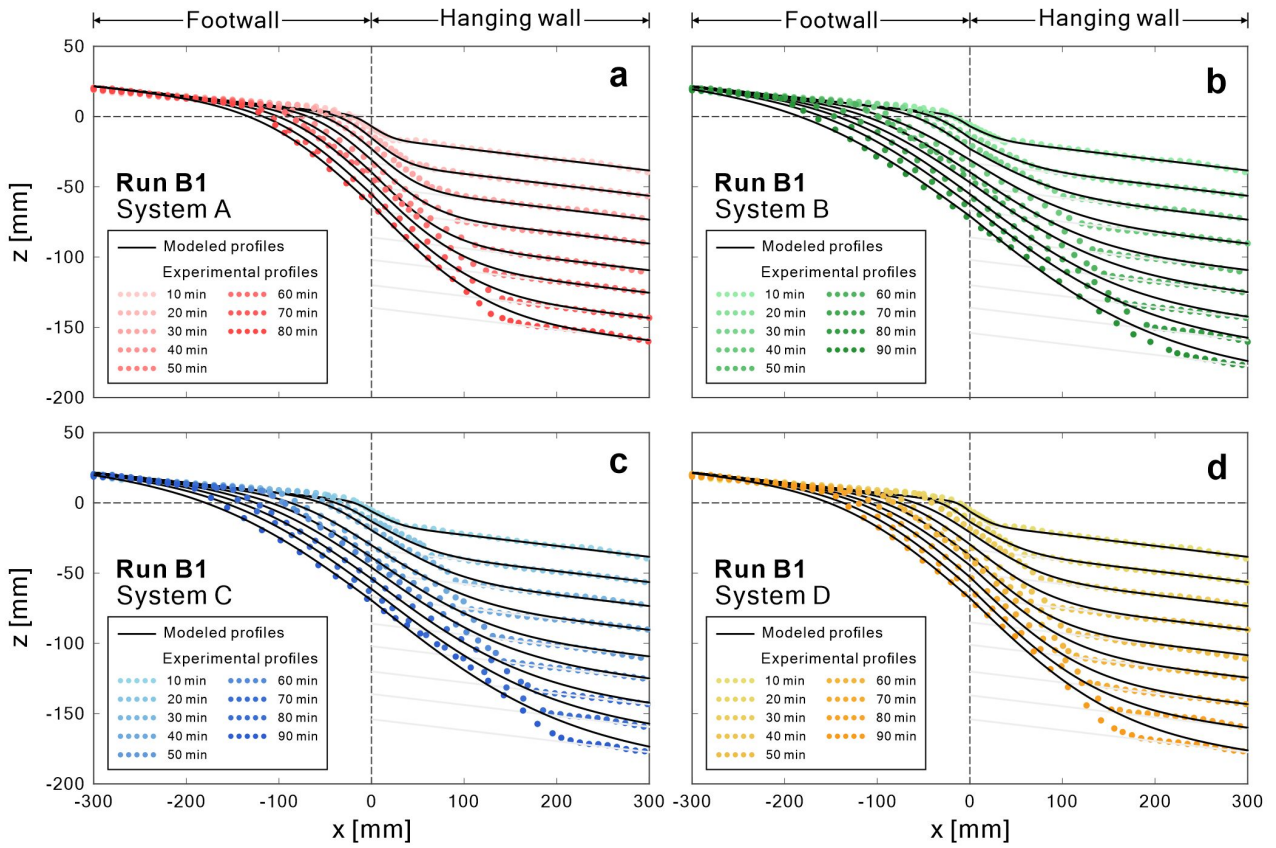

Figure S9. Comparisons between experimental and modeled submarine canyon-fan long profiles of each system at different stages for Run B1.

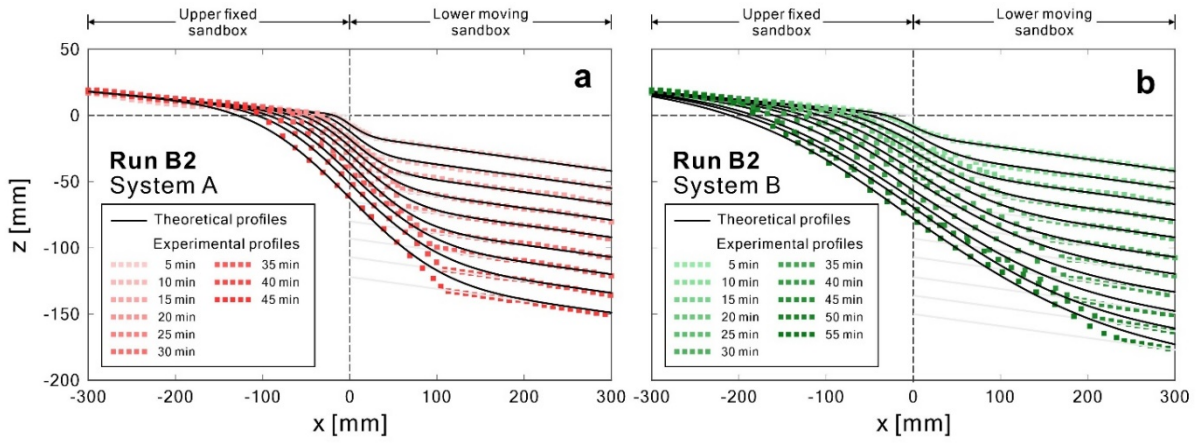

Figure S10. Comparisons between experimental and modeled submarine canyon-fan long profiles of each system at different stages for Run B2.

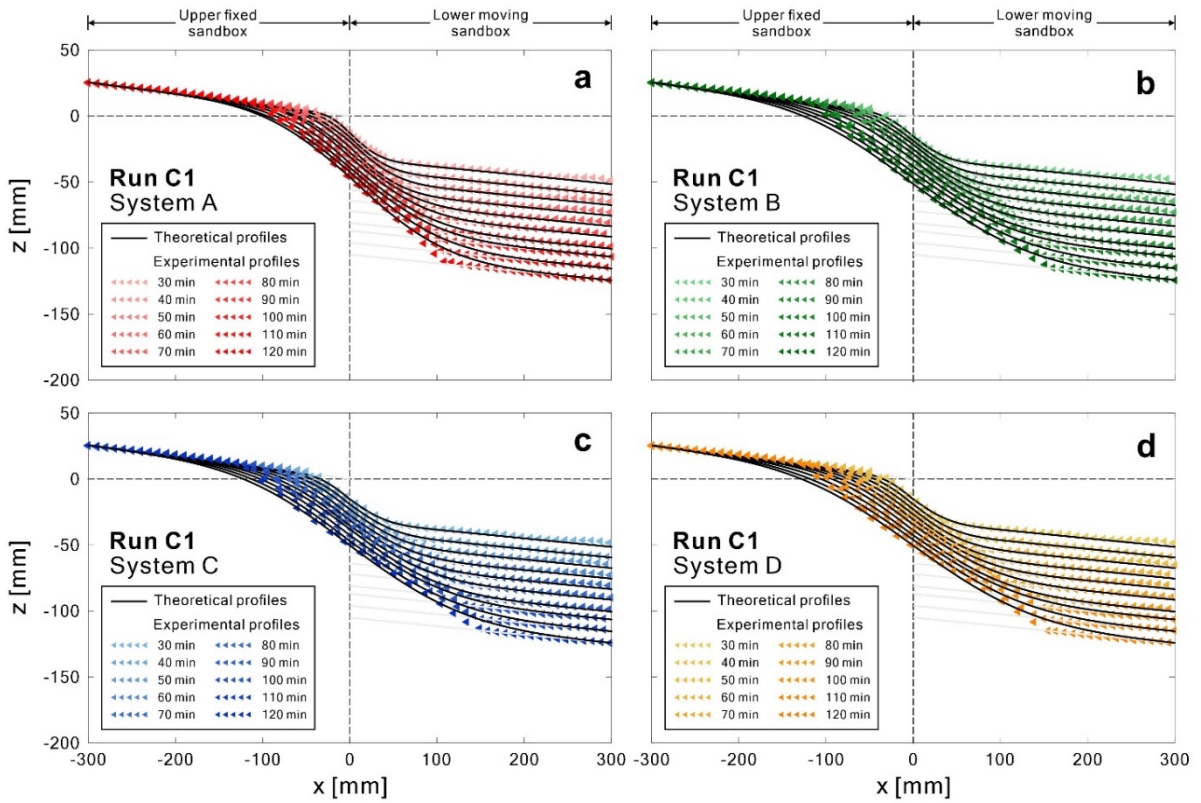

Figure S11. Comparisons between experimental and modeled submarine canyon-fan long profiles of each system at different stages for Run C1.

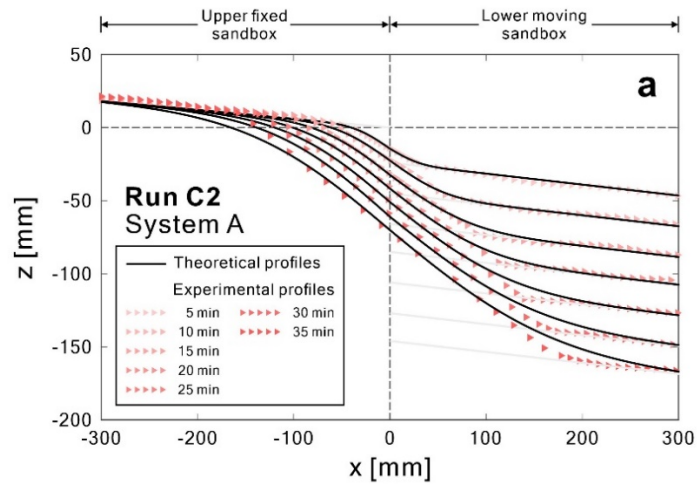

Figure S12. Comparisons between experimental and modeled submarine canyon-fan long profiles of System A at different stages for Run C2.
